# Supplementary material for: A mechanistic study of gold nanoparticles catalysis of O2 reduction by ascorbate and hydroethidine, investigating reactive oxygen species reactivity
Source: Royal Society of Chemistry journal article supplement (doi:10.1039/d3ra00443k), 2023-01-01
Supplement: d3ra00443k1.pdf [file d3ra00443k1.pdf]

## SUPPORTING INFORMATION

### A mechanistic study of gold nanoparticles catalysis of O<sub>2</sub> reduction by ascorbate and hydroethidine, investigating reactive oxygen species formation

Viacheslav Shcherbakov,<sup>\*a</sup> Sergey A. Denisov<sup>a</sup> and Mehran Mostafavi<sup>\*a</sup>

Institut de Chimie Physique (ICP), CNRS/Université Paris-Saclay, 91405 Orsay, France

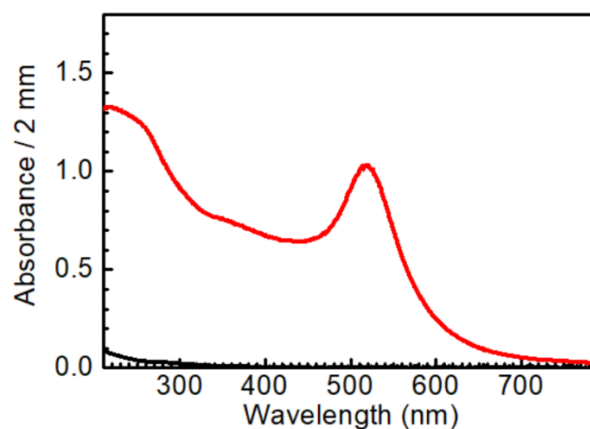

Figure S1. UV-vis absorption spectrum of AuNPs suspension containing 3 mM of gold atoms (red) and its supernatant (black). AuNPs suspension was diluted with deionized water two times before measurement.

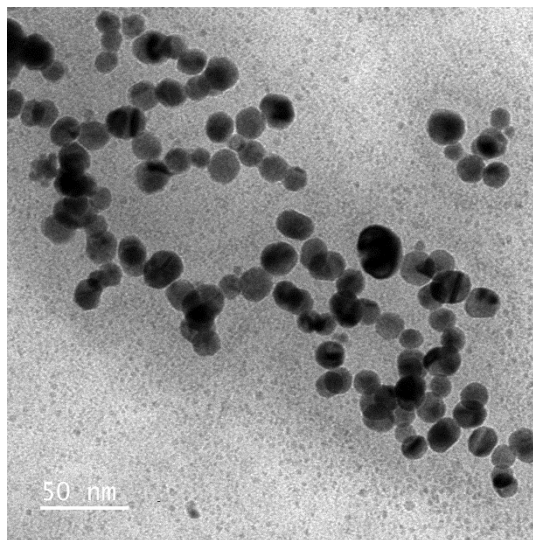

Figure S2. TEM image of AuNPs.

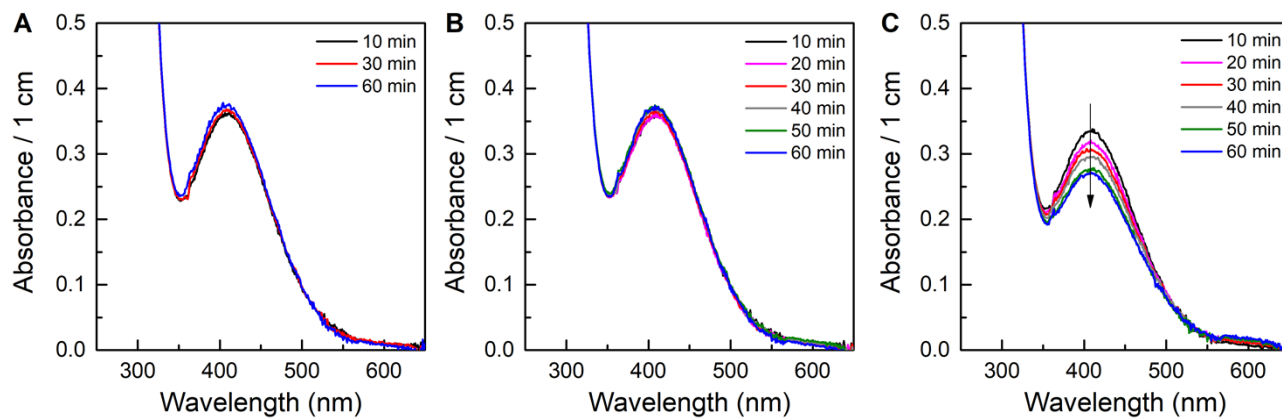

Figure S3. Determination of  $\text{H}_2\text{O}_2$  concentration by  $\text{TiOSO}_4$  assay at pH 7. Initial concentration of  $\text{H}_2\text{O}_2$  was 1 mM. A – in water. B – in supernatant solution. C – in AuNPs suspension,  $[\text{Au}] = 1.5 \text{ mM}$ .
